# Supplementary material
Source: PubMed Central journal article supplement (PMC1599784)
Supplement: rspb20053235s01.pdf [file rspb20053235s01.pdf]

# ELECTRONIC APPENDIX

This is the Electronic Appendix to the article

## **A candidate locus for variation in dispersal rate in a butterfly metapopulation**

by

Christoph R. Haag, Marjo Saastamoinen,  
James H. Marden and Ilkka Hanski

*Proc. R. Soc. B* ([doi:10.1098/rspb.2005.3235](https://doi.org/10.1098/rspb.2005.3235))

Electronic appendices are refereed with the text; however, no attempt is made to impose a uniform editorial style on the electronic appendices.

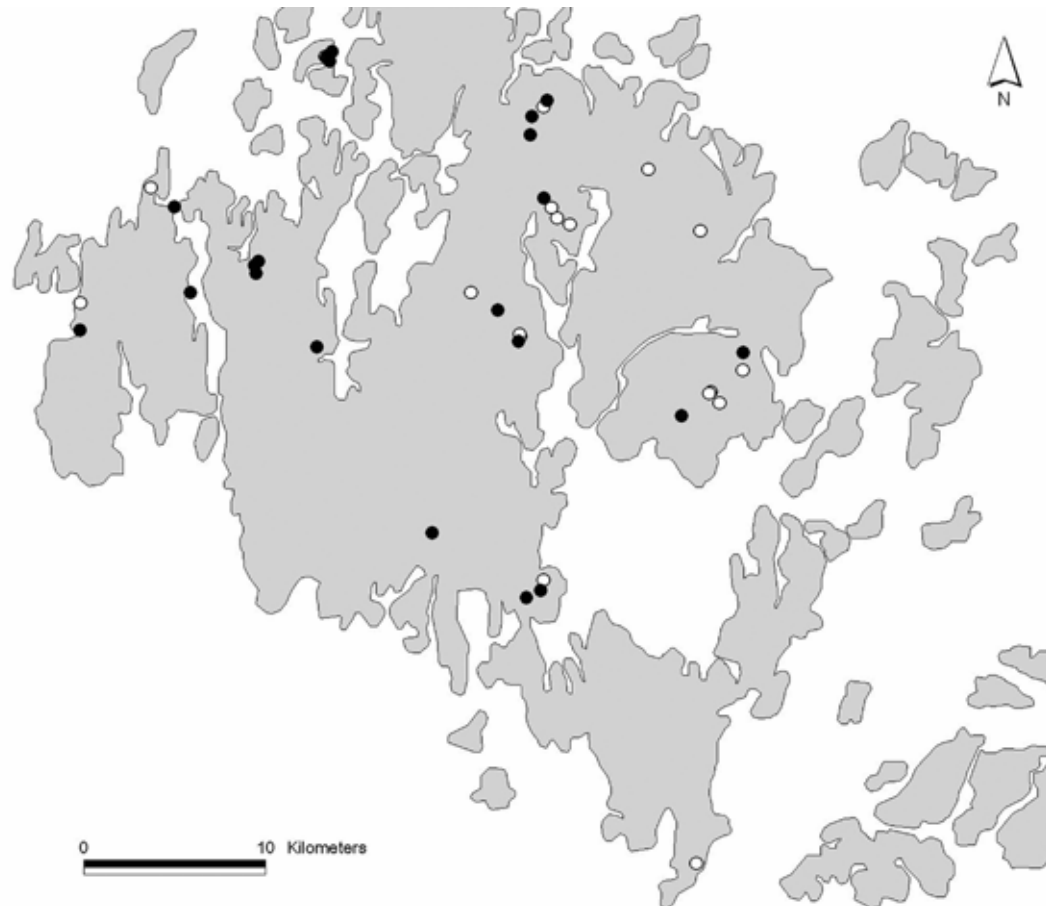

1

2

3 ***Supporting Fig. S1: Map of the populations sampled***

4       New populations (empty circles) and old populations (filled circles) were  
5 similarly scattered across the archipelago.

6

7 ***Supporting text S2: Respirometry methods***

8       Excurrent air from the respirometer passed through a 3 ml column containing  
9 magnesium perchlorate to remove water vapour, a flow meter, and a CO<sub>2</sub> gas  
10 analyzer (LiCor 6251; the pump and flow meter were part of a Sable Systems  
11 FOXBOX instrument). Output signals from the flow meter, CO<sub>2</sub> analyzer, and a  
12 thermistor (Sable Systems SS-TC1) measuring air temperature inside the jar were  
13 digitized and recorded at a 1Hz sampling frequency (Sable Systems UI2 interface

1 and DATACAN software) on a Macintosh G4 Powerbook computer running Virtual  
2 PC 6.0 (Connectix).

3 For these measurements, butterflies were removed from the outdoor cage in the  
4 morning (8.00 – 10.00 h), transported to the laboratory in individual cages and kept  
5 outdoors in the shade (ca. 20°C). Approximately 30 min prior to each respirometry  
6 test, the butterfly was brought indoors to adjust to a warmer temperature (ca. 26°C),  
7 then placed gently in the respirometry jar. Flight was initially inhibited by covering  
8 the jar with a black cloth until a stable baseline was established for the resting rate of  
9 CO<sub>2</sub> emission. The cloth was then removed and the jar was placed under a UV light  
10 source and shaken gently to stimulate flight.

11

12
